# Supplementary material for: Lattice matching and halogen regulation for synergistically induced large Li and Na storage by halogenated MXene V3C2Cl2
Source: Royal Society of Chemistry journal article supplement (doi:10.1039/d3cp05878f), 2024-01-01
Supplement: d3cp05878f2.pdf [file d3cp05878f2.pdf]

Electronic Supplementary Material (ESI)

**Lattice Matching and Halogen Regulation for Synergistically  
Induced large Li and Na storage by Halogenated MXene  $V_3C_2Cl_2$**

*Min Zhou,<sup>1,#</sup> Yanqing Shen,<sup>1,2,#,\*</sup> LingLing Lv,<sup>1</sup> Yu Zhang,<sup>1</sup> Xianghui Meng,<sup>1</sup> Xin Yang,*

*<sup>1</sup> Qirui He,<sup>1</sup> Bing Zhang,<sup>1</sup> Long Pang,<sup>1,3,\*</sup> Peng E,<sup>1,3,\*</sup> Zhongxiang Zhou<sup>1,2</sup>*

1 School of Physics, Harbin Institute of Technology, Harbin 150001, PR China

2 Heilongjiang Provincial Key Laboratory of Plasma Physics and Application

Technology, Harbin Institute of Technology, Harbin 150001, PR China

3 Laboratory for Space Environment and Physical Sciences, Harbin Institute of

Technology, Harbin, 150001, China

#These authors contributed equally to this work.

\* Corresponding author: Yanqing Shen. E-mail: [shenyanqing2004@163.com](mailto:shenyanqing2004@163.com)

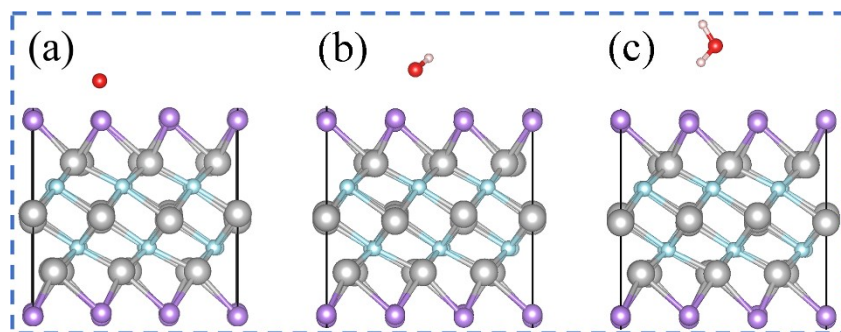

**Figure S1.** Optimized structures of O, OH, and H<sub>2</sub>O on the V<sub>3</sub>C<sub>2</sub>Cl<sub>2</sub> monolayer. (a) O-adsorption; (b) OH-adsorption; (c) H<sub>2</sub>O-adsorption.

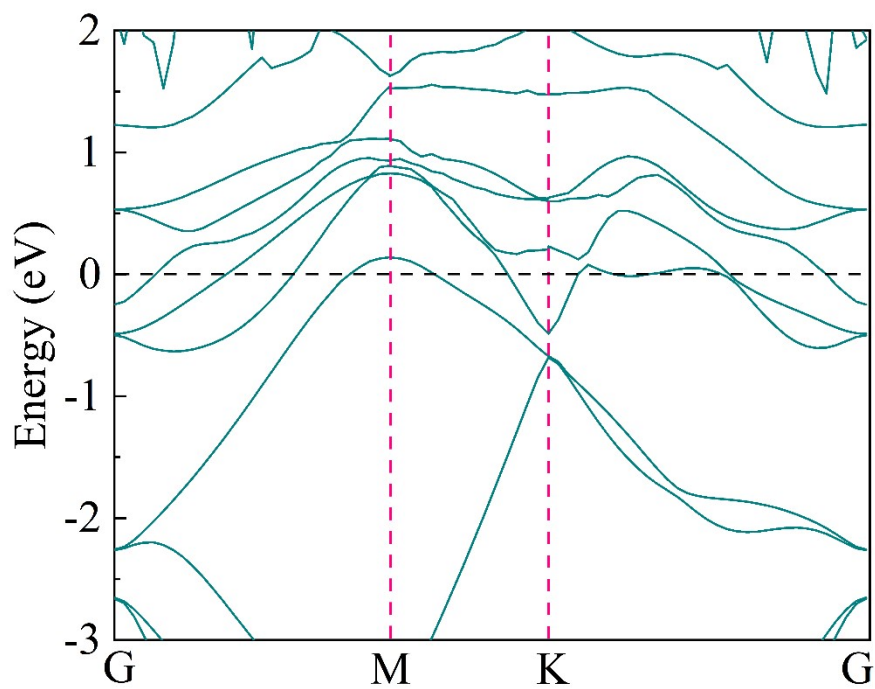

**Figure S2:** Band structures of V<sub>3</sub>C<sub>2</sub>Cl<sub>2</sub> monolayer with HSE06 method.

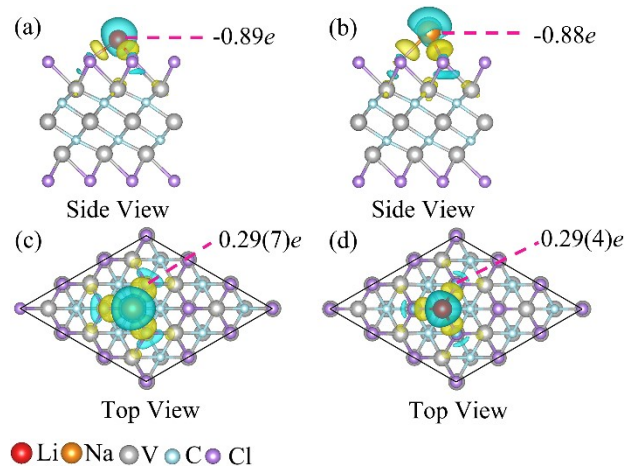

**Figure S3:** Charge density difference (CDD) maps of Li and Na on site  $S_V$  in  $V_3C_2Cl_2$  monolayer, respectively. The green areas represent electron depletion, and the yellow areas represent electron gains.

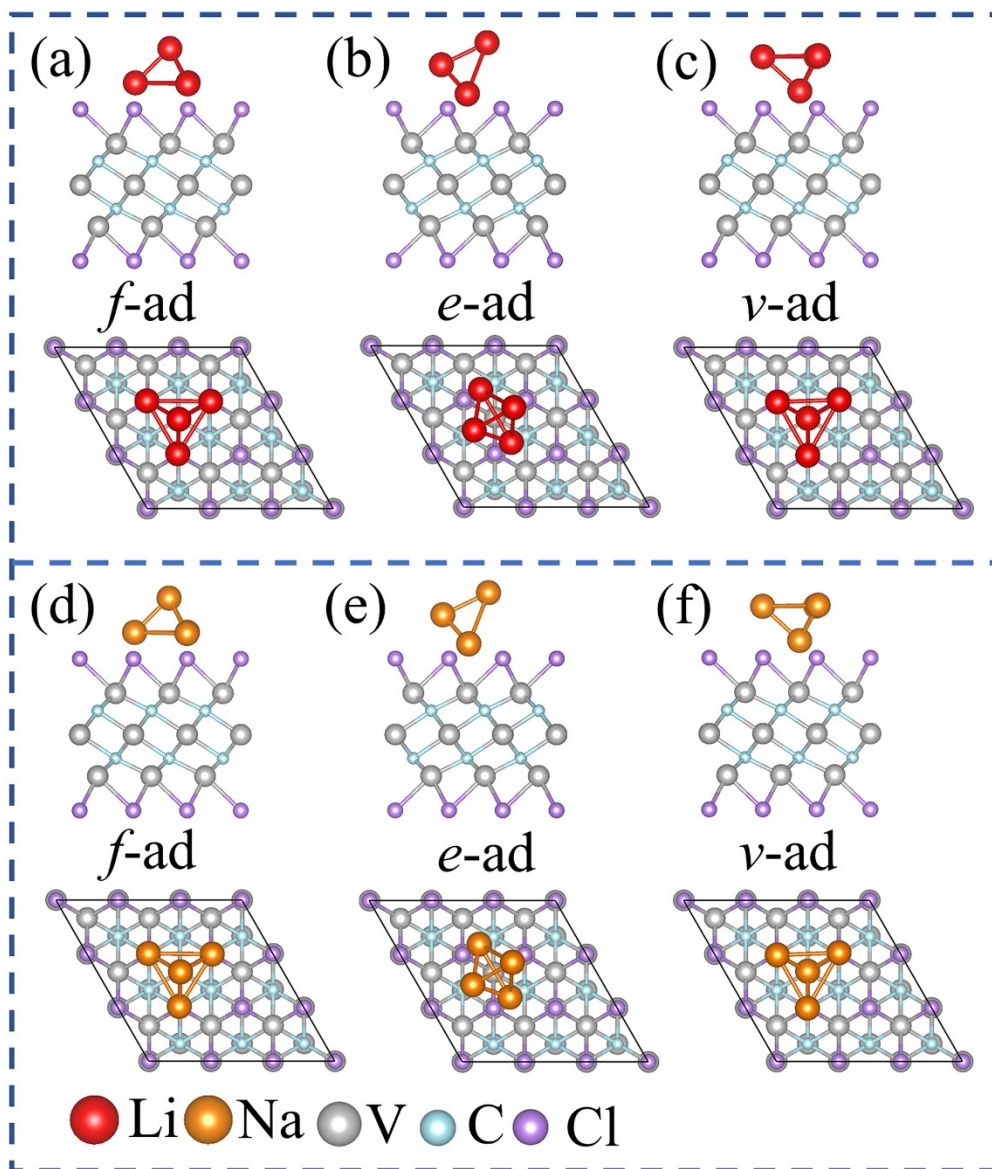

**Figure S4:** Before structural optimization of  $\text{Li}_4/\text{Na}_4$  cluster adsorb on the  $\text{V}_3\text{C}_2\text{Cl}_2$  monolayer. (a), (b) and (c) are the structures with  $\text{Li}_4$  cluster adsorption; (d), (e) and (f) are the structures with  $\text{Na}_4$  cluster adsorption; The  $f$ -ad,  $e$ -ad, and  $v$ -ad represent  $\text{Li}_4/\text{Na}_4$  clusters adhere to the surface in the form of monolayer-parallel arrangements, with each cluster oriented parallel to the surface along its face, edge, or vertex.

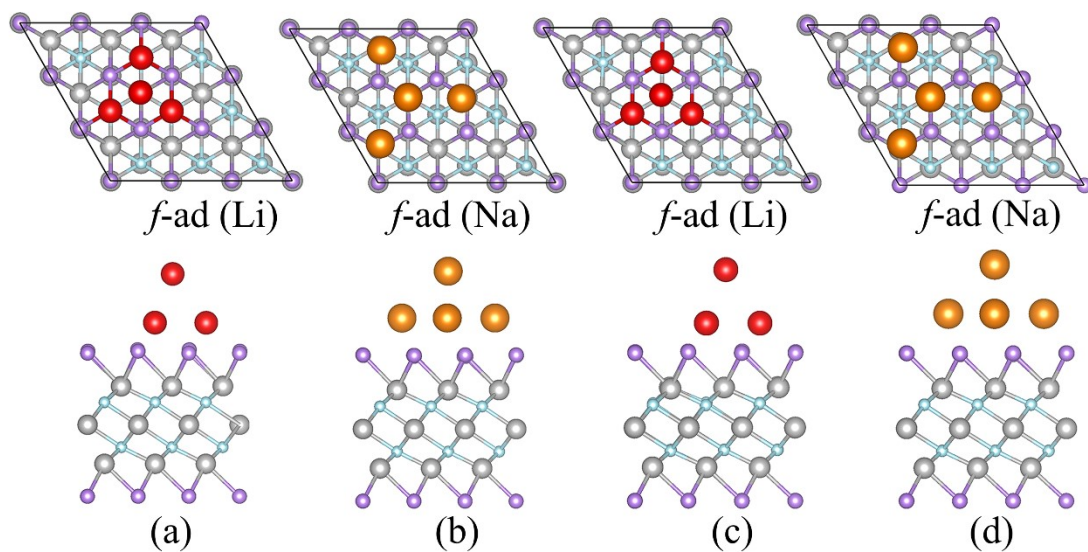

**Figure S5:** After structural optimization of  $\text{Li}_4/\text{Na}_4$  cluster adsorb on the  $\text{V}_3\text{C}_2\text{Cl}_2$  monolayer. (a) and (b) are the structures with  $\text{Li}_4/\text{Na}_4$  cluster adsorption with fixed the  $\text{V}_3\text{C}_2\text{Cl}_2$  monolayer; (c) and (d) are the structures with  $\text{Li}_4/\text{Na}_4$  cluster adsorption without fixed the  $\text{V}_3\text{C}_2\text{Cl}_2$  monolayer.

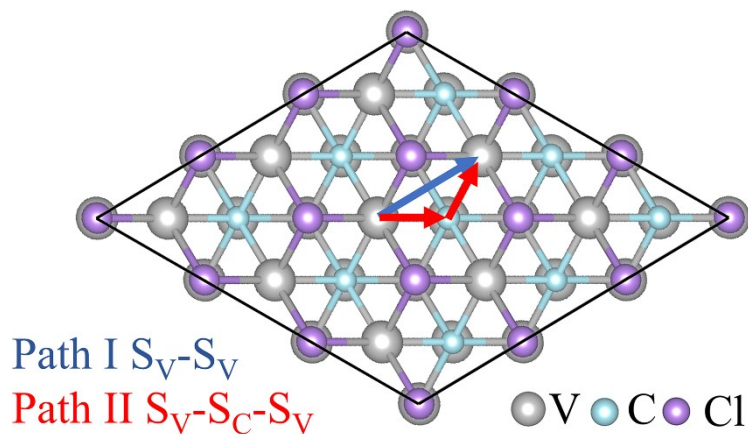

**Figure S6:** Li/Na migration path on the  $\text{V}_3\text{C}_2\text{Cl}_2$  monolayer. Path I is the path that the Li/Na diffuse from the  $S_V$  site to  $S_V$  site directly; Path II is the path that the Li/Na diffuse from the  $S_V$  site to  $S_C$  site and then diffuse from the  $S_C$  site to  $S_V$  site.

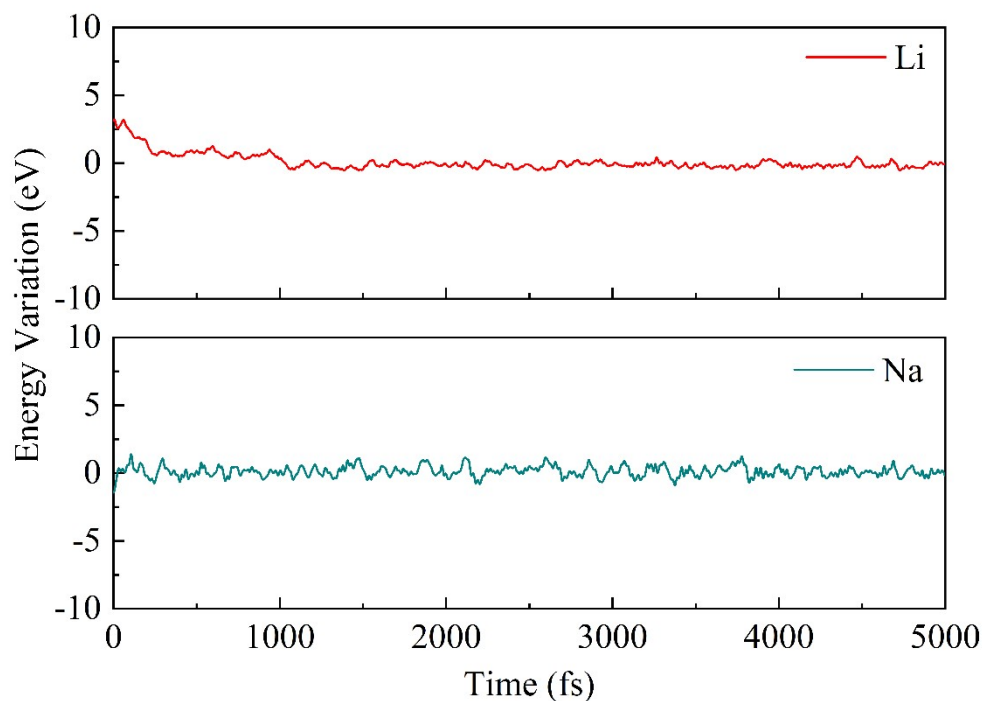

**Figure S7:** Variation in free energy over 5 ps during the AIMD simulation at 300 K of  $V_3C_2Cl_2$  monolayer with maximum Li/Na adsorption concentration.

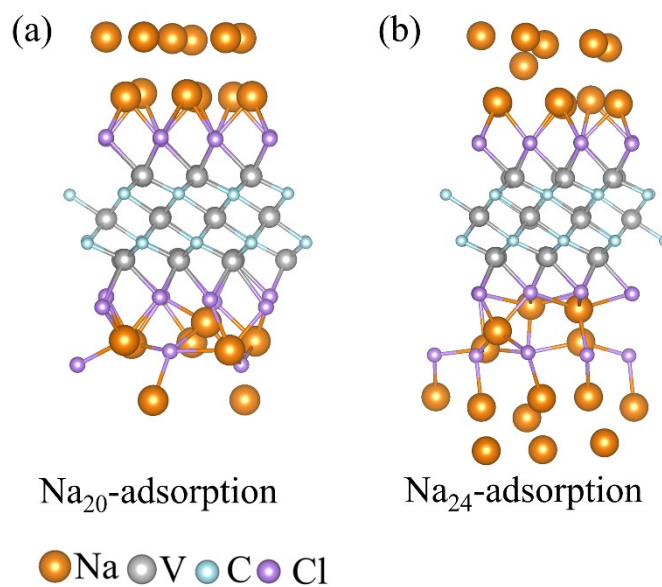

**Figure S8:** Adsorption structures of 20<sup>th</sup> and 24<sup>th</sup> Na atoms on the  $V_3C_2Cl_2$  monolayer. (a) 20<sup>th</sup> Na atoms adsorption; (b) 24<sup>th</sup> Na atoms adsorption.

**Table S1.** The Bader charge of  $V_3C_2Cl_2$ ,  $V_1$  represents the V atom on the surface of MXenes, and  $V_2$  is the central one.

| MXenes       | $V_1$   | $V_2$   | C      | Cl     |
|--------------|---------|---------|--------|--------|
| $V_3C_2$     | -1.00 e | -1.41 e | 1.71 e | -      |
| $V_3C_2Cl_2$ | -1.48 e | -1.39 e | 1.61 e | 0.57 e |

**Table S2.** Calculated the adsorption energies of Li and Na on the  $V_3C_2Cl_2$  monolayer. The negative value represents exothermic adsorption.

| Energy | $E_V$ (eV) | $E_C$ (eV) | $E_{Cl}$ (eV) |
|--------|------------|------------|---------------|
| Li     | -0.88      | -0.86      | -             |
| Na     | -0.78      | -0.78      | -             |

## Supplementary Discussion I

The energies of gas molecules adsorb on the  $V_3C_2Cl_2$  monolayer are defined as,<sup>1-</sup>

2

$$E_{ads} = E_{L+M} - E_L - E_M \quad (1)$$

where  $E_{ads}$  is the adsorption energies,  $E_L$  represent the energy of  $V_3C_2Cl_2$  monolayer, and  $E_M$  are the energies of O, OH, and  $H_2O$  energies. The energy of O is expressed as half of the binding energy of the oxygen molecule. The adsorption configuration is deemed spontaneous and exothermic when the adsorption energy is negative. Nonetheless, the optimized structures reveal that O, OH, and  $H_2O$  molecules have not undergone adsorption on the monolayer. In light of the aforementioned observations, one can infer that the  $V_3C_2Cl_2$  monolayer exhibits both corrosion resistance and hydrophobicity.

## References

- [1] M. Li, X.L. Li, G.F. Qin, K. Luo, J. Lu, Y.B. Li, G.J. Liang, Z.D. Huang, J. Zhou, L. Hultman, P. Eklund, P. Persson, S.Y. Du, Z.F. Chai, C.Y. Zhi, Q. Huang Halogenated  $Ti_3C_2$  MXenes with Electrochemically Active Terminals for High-Performance Zinc Ion Batteries, ACS Nano 2021, 15, 1077-1085.
- [2] J. Zhao, N.G. Ma, T.R. Wang, N. Li, Y.H. Wang, J. Fan, Theoretical Design of High-Performance Halogen Anion Batteries with MXene Electrodes: Influence of Functional Groups, Metals, and Anions, J. Mater. Chem. A, 2022, 10, 21611-21621.
